# Supplementary material
Source: PubMed Central journal article supplement (PMC5734942)

Supplementary Figure - uncropped scans with size marker indications for the blots shown in Extended Data Fig. 3f

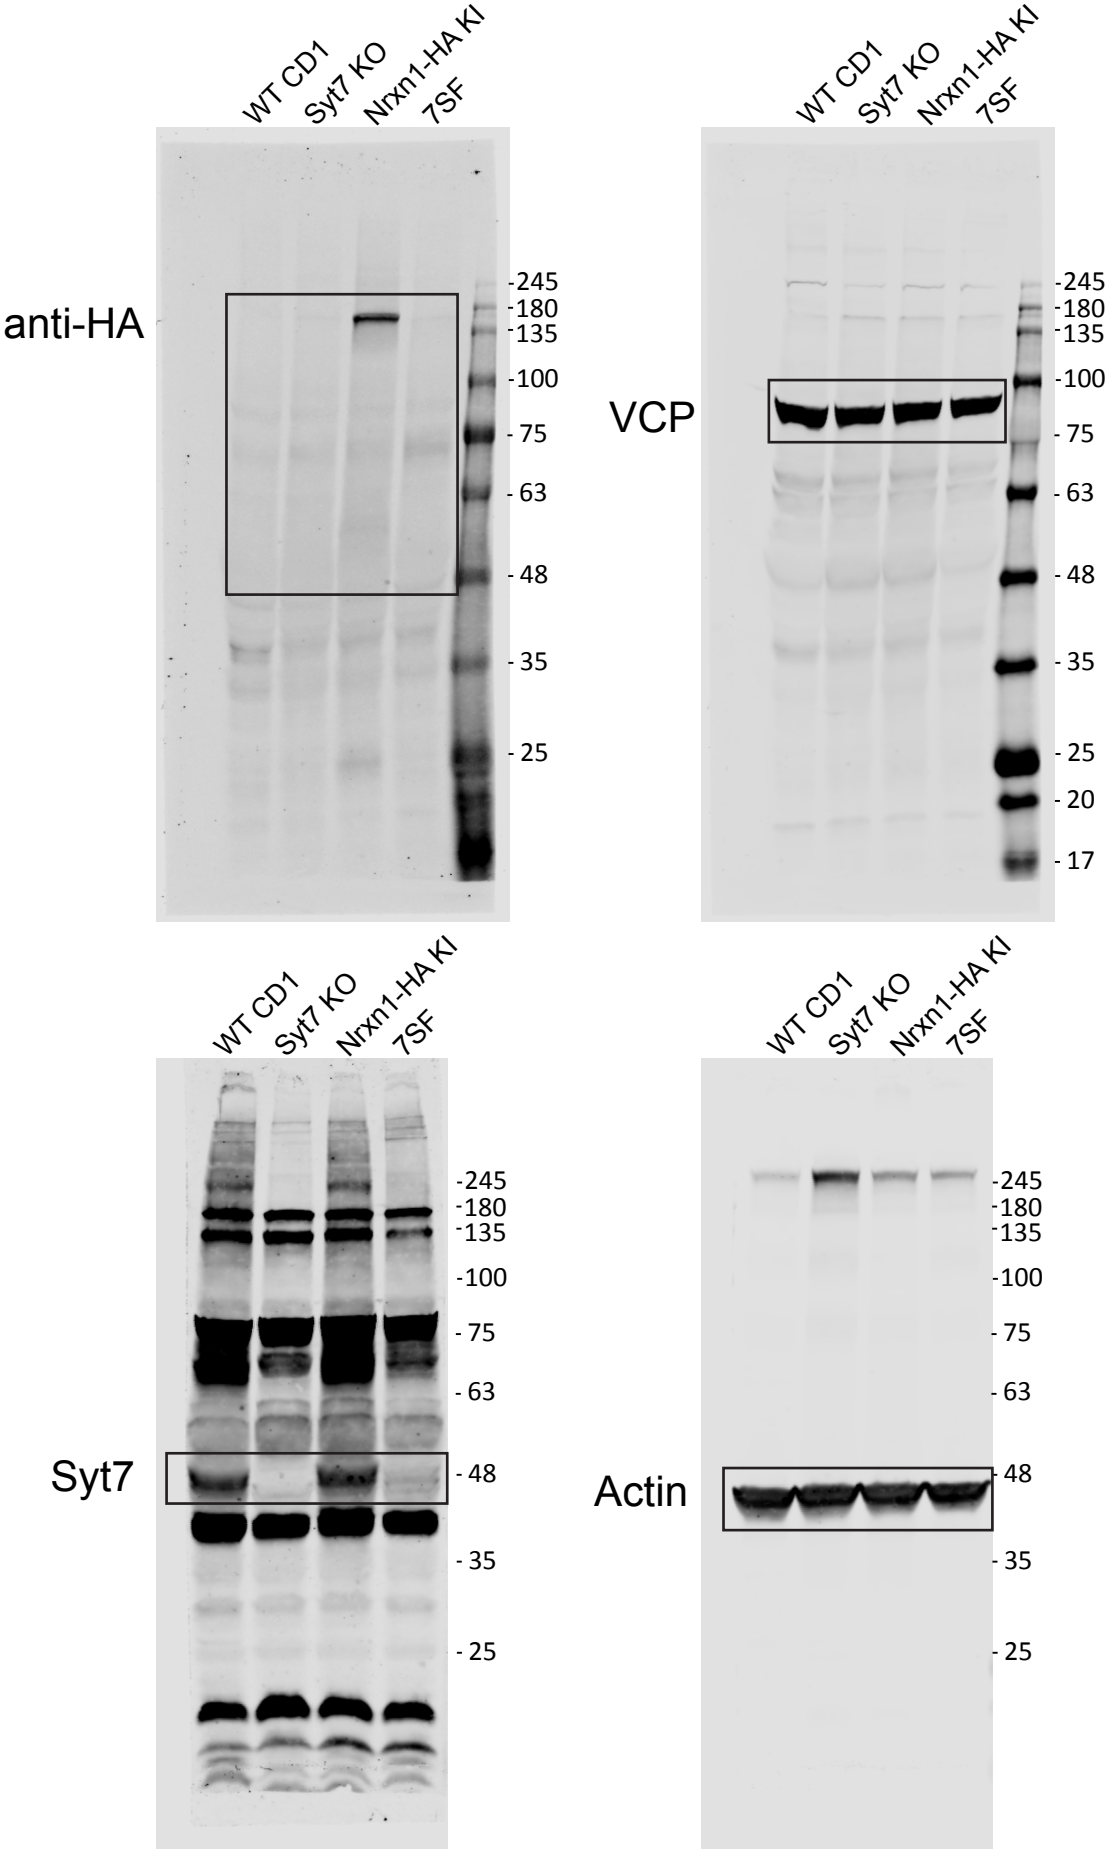

Supplement: NIHMS855041-supplement-supp_info.pdf [file NIHMS855041-supplement-supp_info.pdf]
